# Supplementary material for: Comprehensive validation of T- and B-cell deficiency in rag1-null zebrafish: Implication for the robust innate defense mechanisms of teleosts
Source: PubMed Central journal article supplement (PMC5548773; doi:10.1038/s41598-017-08000-2), 2017-08-08
Supplement: 41598_2017_8000_MOESM1_ESM.pdf [file 41598_2017_8000_MOESM1_ESM.pdf]

# **Comprehensive validation of T- and B-cell deficiency in *rag1*-null zebrafish: Implication for the robust innate defense mechanisms of teleosts**

Yumie Tokunaga<sup>1,4</sup>, Masamichi Shirouzu<sup>1</sup>, Ryota Sugahara<sup>1</sup>, Yasutoshi Yoshiura<sup>2</sup>, Ikunari Kiryu<sup>3</sup>, Mitsuru Ototake<sup>3</sup>, Takahiro Nagasawa<sup>1</sup>, Tomonori Somamoto<sup>1\*</sup>, Miki Nakao<sup>1</sup>.

1. Laboratory of Marine Biochemistry, Department of Bioscience and Biotechnology, Graduate School of Bioresource and Bioenvironmental Sciences, Kyushu University, Fukuoka 812-8581,

2. Yashima station, Stock Enhancement and Management Department, National Research Institute of Fisheries and Enhancement of Inland Sea, Japan Fisheries Research and Education Agency, 243 Yashima-higashi, Takamatsu, Kagawa, 761-0111, Japan.

3. National Research Institute of Aquaculture, Fisheries Research Agency, Tamaki, Mie, 519-0423, Japan.

4. Instituto de Medicina Molecular, Faculdade de Medicina, Universidade de Lisboa, Lisboa, Portugal.

## **\*Corresponding author:**

Tomonori Somamoto

Phone: (81)-92-642-2895; Fax: (81)-92-642-2897

E-mail: somamoto@agr.kyushu-u.ac.jp

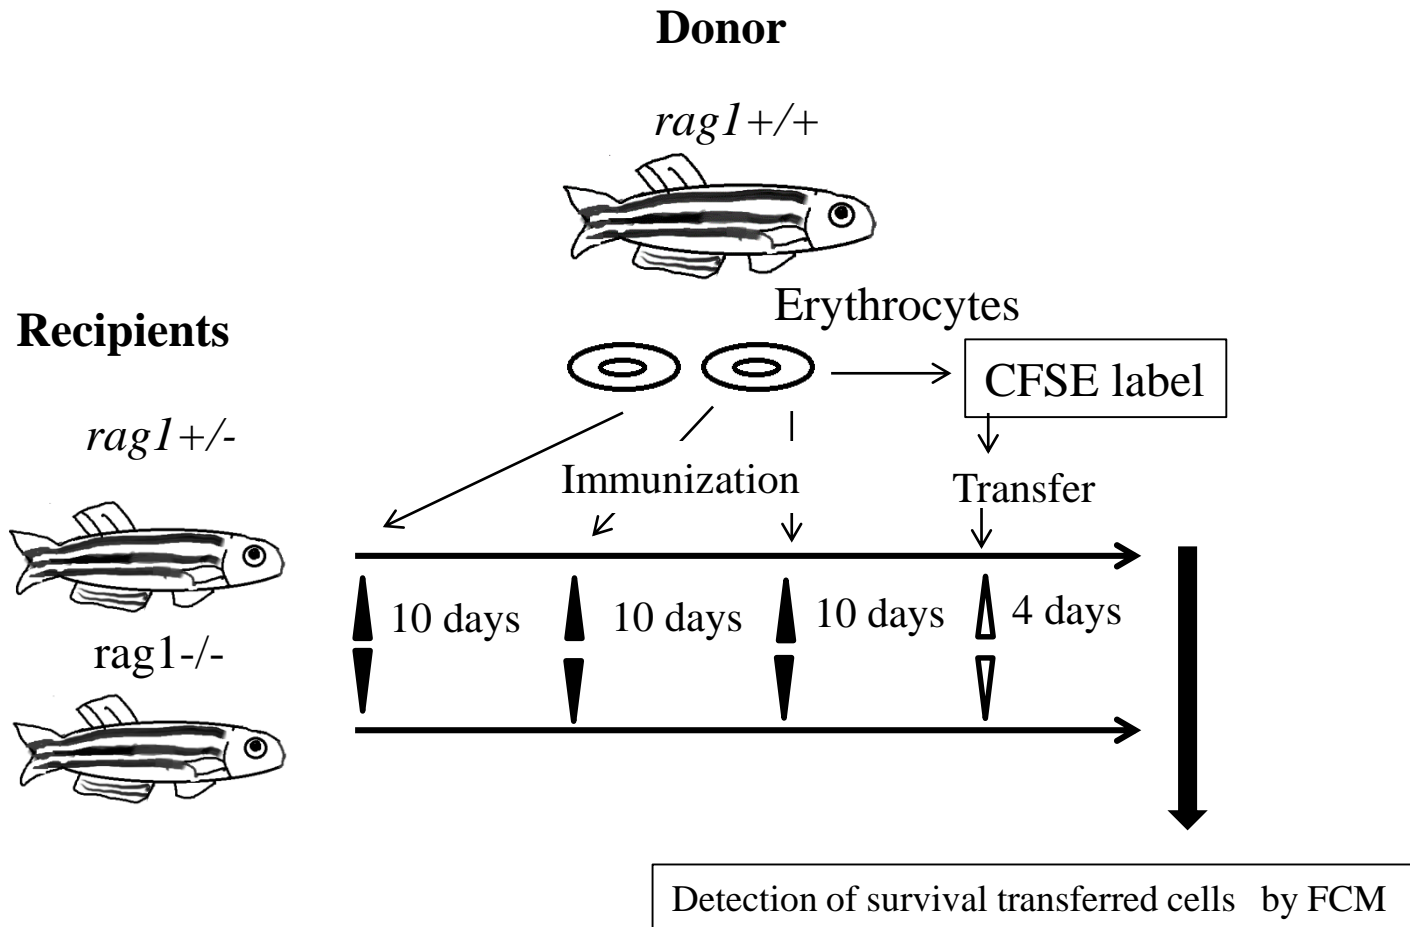

**Fig. S1.** Experimental scheme for the rejection of in vivo allogeneic erythrocytes in zebrafish. Black arrowheads indicate immunization with  $1.0 \times 10^6$  allogeneic erythrocytes. Open arrowheads indicated transplantation with  $1.0 \times 10^7$  5(6)-carboxyfluorescein diacetate *N*-succinimidyl ester (CFSE)-labeled allogeneic erythrocytes. Arrow indicates the collection of erythrocytes from the recipient and detection of CFSE-labeled erythrocytes by flow cytometry. Three pairs of donors and recipients were tested in each strain of fish.

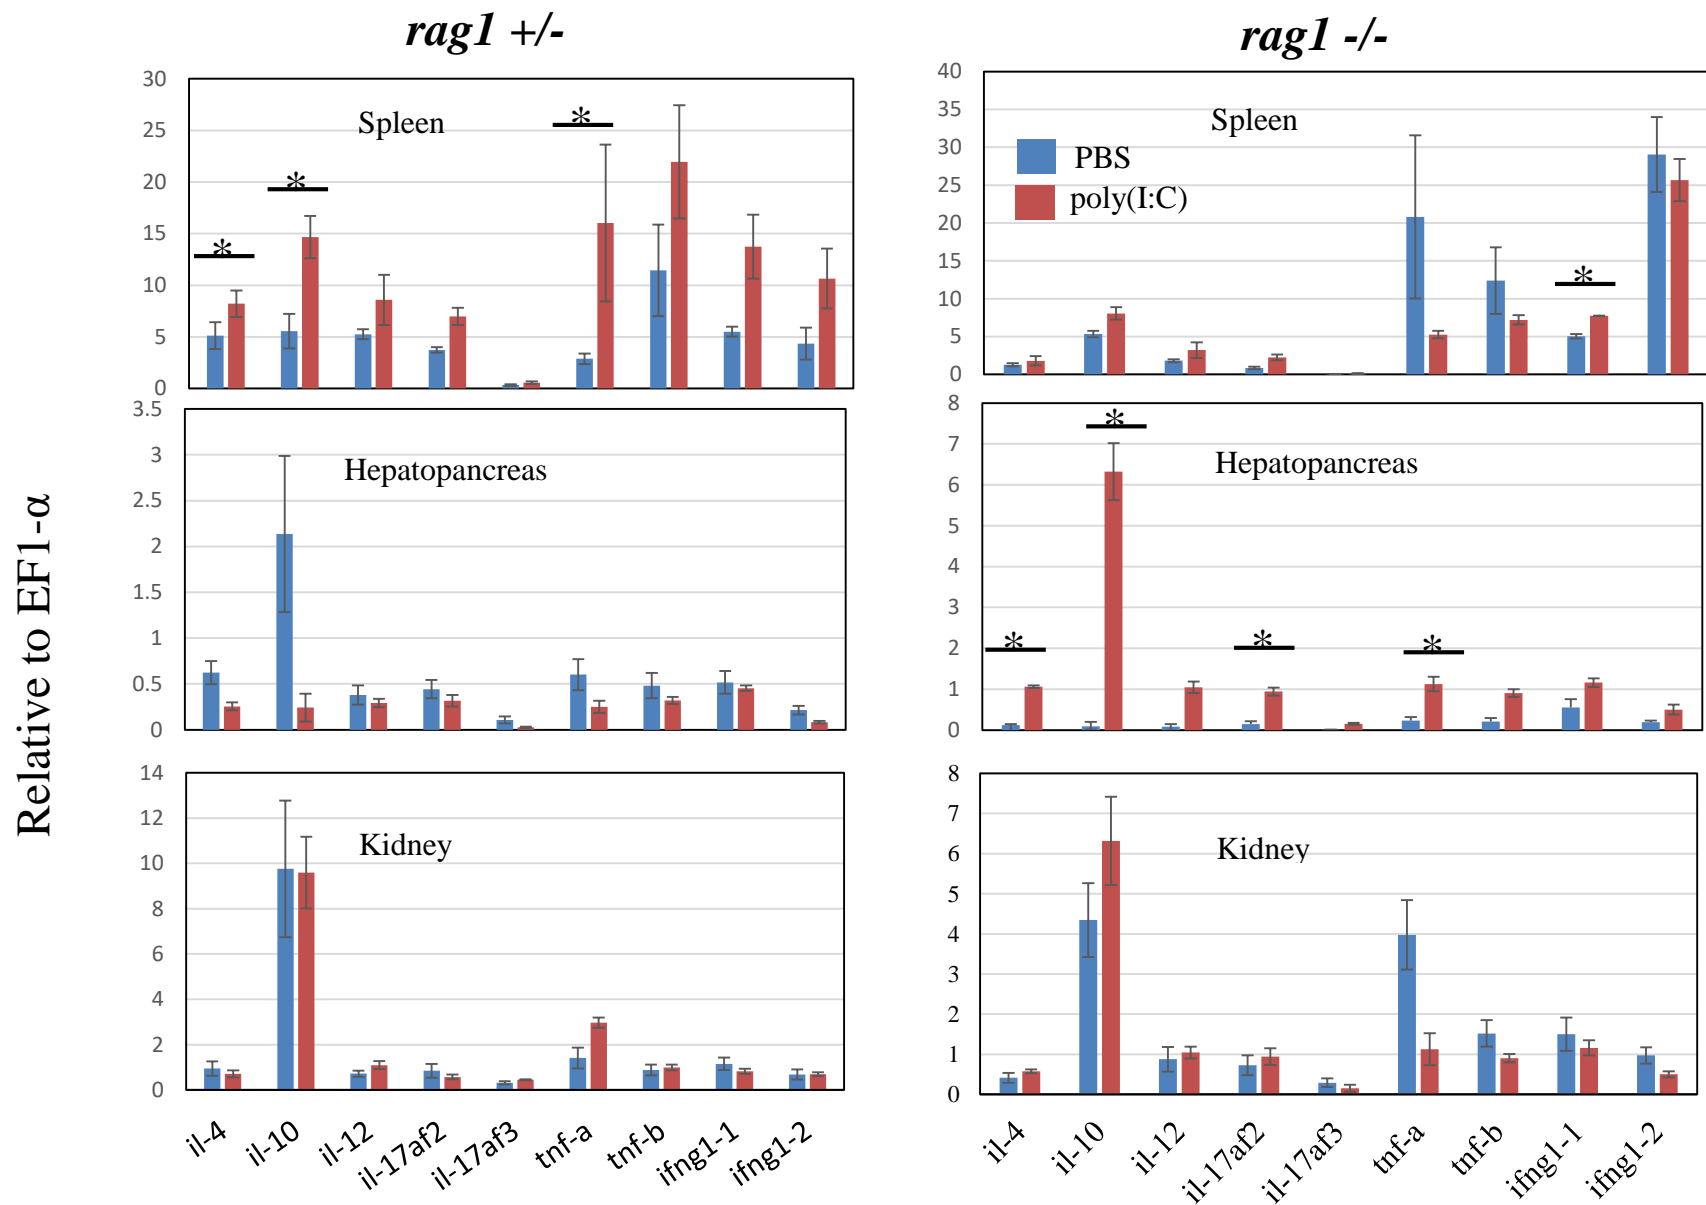

**Fig. S2.** Expression of cytokines in the spleen, hepatopancreas and kidney from *ragl*<sup>+/-</sup> and *ragl*<sup>-/-</sup> fish that were injected with PBS (■) and poly(I:C) (■). Data from the three individual experiments are shown as the mean of relative value to EF1- $\alpha$ . Statistical comparisons between stimulated and control fish were made using an unpaired *t*-test. Asterisks indicate significant differences at  $P < 0.05$ .

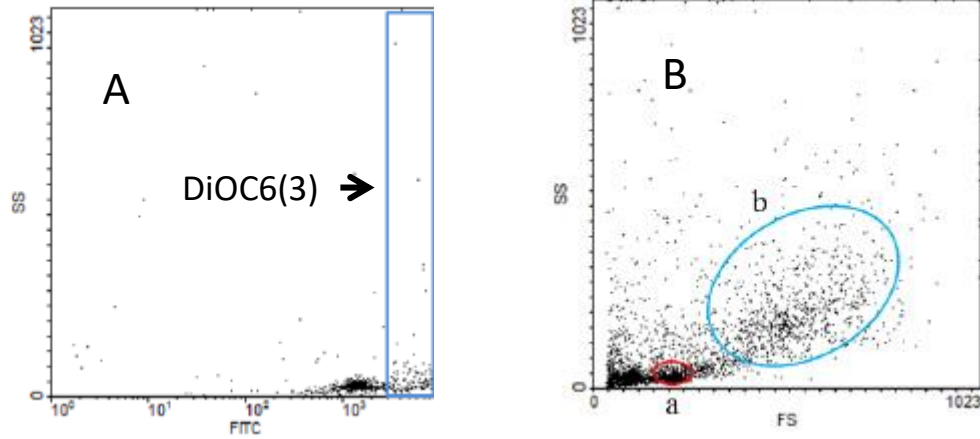

**Fig. S3.** Representative scatter plots of kidney leukocytes from wildtype zebrafish in flow cytometry analysis. The blue rectangle gate indicates DiOC6(3)-positive cells (A). Forward scatter (FS) and side scatter (SS) analysis: Lymphocyte (a) and macrophage/neutrophil (b) gate (B).

Table S1 Primers for real time PCR.

| Target genes     | Primer sequences (5'→3')                                |
|------------------|---------------------------------------------------------|
| IL-1 $\beta$     | F: TTCCCCAAGTGCTGCTTATT<br>R: AAGTTAAAACCGCTGGTCA       |
| IL-4             | F: AGTCACGCTGCTGATGAAGA<br>R: AACTTGGTCTTGGGCTTTTT      |
| IL-10            | F: ATAGGATGTTGCTGGGTTGG<br>R: GTGGATGAAGTCCATTTGTGC     |
| IL-12            | F: GCTGAAGGAGTGTTTCCTCAGT<br>R: TGACATCATTTCCCTGTGCTCTC |
| IL-17AF2         | F: CTGCACTGGGCTTCAAAGAT<br>R: TCAATCTGAGGACGGAAAGG      |
| IL-17AF3         | F: TCTCTGTCGCCTTGGACATAC<br>R: GTCCTCCTCACCGTCTTTTG     |
| TNF $\alpha$ 1   | F: GCGCTTTTCTGAATCCTACG<br>R: TGCCCAGTCTGTCTCCTTCT      |
| TNF $\alpha$ 2   | F: AAGCCAAACGAAGAAGGTCA<br>R: AACCCATTTTCAGCGATTGTC     |
| IFN $\phi$ 1     | F: ACGACAGAATCTCTGAACCT<br>R: GTCAGGACTAAAACTTCAC       |
| IFN $\gamma$ 1-1 | F: TTCAGACAACCAGCGCATAAC<br>R: AACCCAATCCTTTGCAAGC      |
| IFN $\gamma$ 1-2 | F: TGCAGAGCTCAGGACGTATG<br>R: CTTTAGCCTGCCGTCTCTTG      |
| EF1 $\alpha$     | F: AACAGCTGATCGTTGGAGTCAA<br>R: TTGATGTATGCGCTGACTTCCT  |
